# Supplementary material for: AgPd–MnOx supported on carbon nanospheres: an efficient catalyst for dehydrogenation of formic acid
Source: Royal Society of Chemistry journal article supplement (doi:10.1039/c6nj03873e), 2017-01-01
Supplement: c6nj03873e1.pdf [file c6nj03873e1.pdf]

## **Electronic Supplementary Information**

### **AgPd-MnO<sub>x</sub> supported on carbon nanospheres: An efficient catalyst for dehydrogenation of formic acid**

Xiaoyu Zhang, Ningzhao Shang, Xin Zhou, Cheng Feng\*, Shutao Gao, Qiuhua  
Wu, Zhi Wang, Chun Wang\*

College of Science, Agricultural University of Hebei, Baoding 071001, China

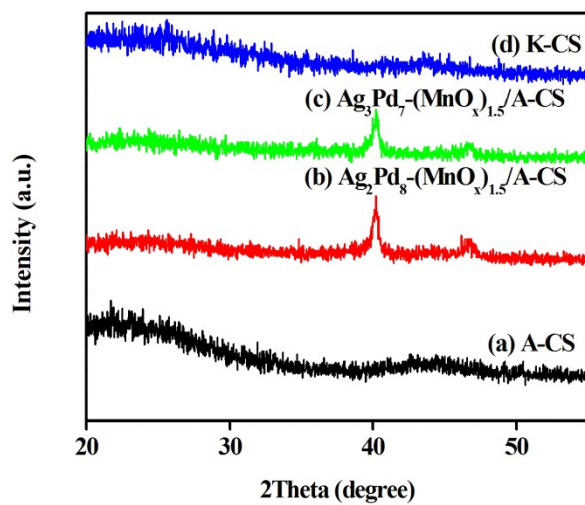

**Fig. S1** X-ray diffraction patterns for as-prepared carbon spheres and AgPd-MnO<sub>x</sub>/carbon spheres. (a) A-CS, (b) Ag<sub>2</sub>Pd<sub>8</sub>-(MnO<sub>x</sub>)<sub>1.5</sub>/A-CS, (c) Ag<sub>3</sub>Pd<sub>7</sub>-(MnO<sub>x</sub>)<sub>1.5</sub>/A-CS, (d) K-CS

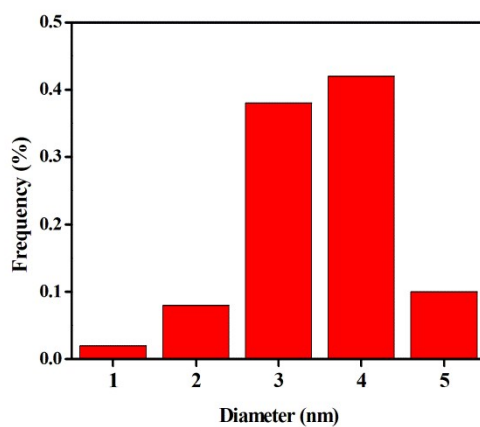

**Fig. S2** The corresponding particle size distributions of Ag<sub>1</sub>Pd<sub>9</sub>-(MnO<sub>x</sub>)<sub>1.5</sub>/A-CS.

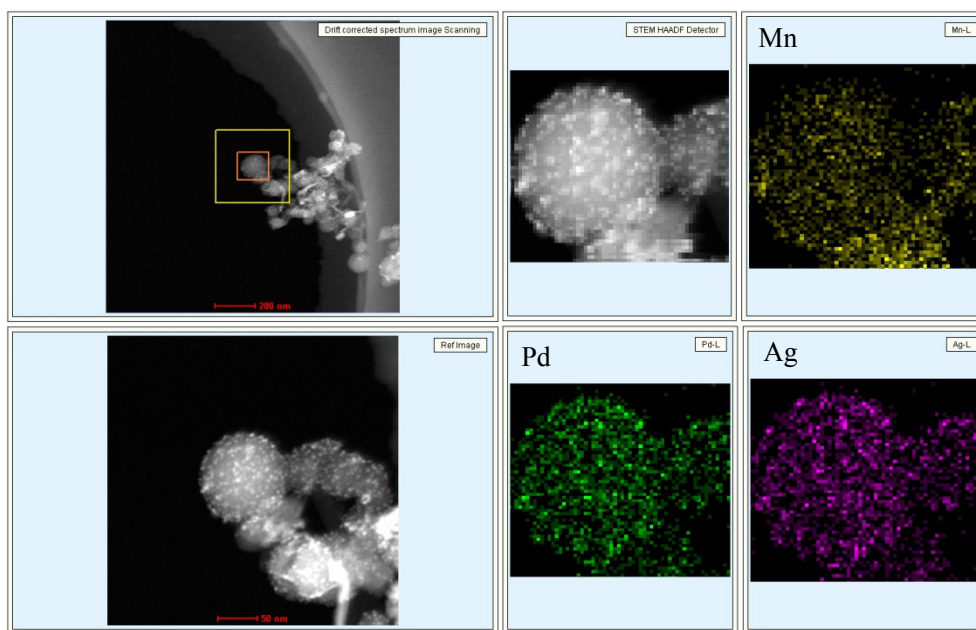

**Fig. S3** The corresponding elemental mapping for Ag, Pd and Mn

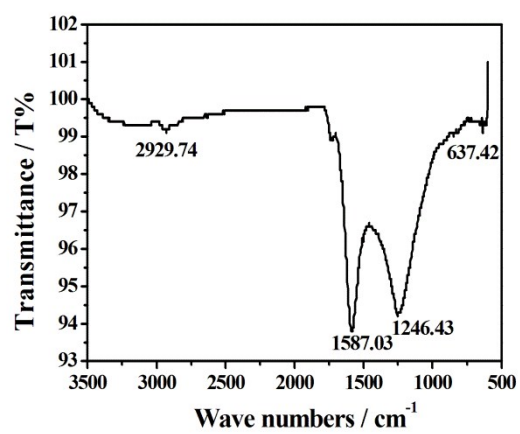

**Fig. S4** The ATR FT-IR spectra of Ag<sub>1</sub>Pd<sub>9</sub>-(MnO<sub>x</sub>)<sub>1.5</sub>/A-CS

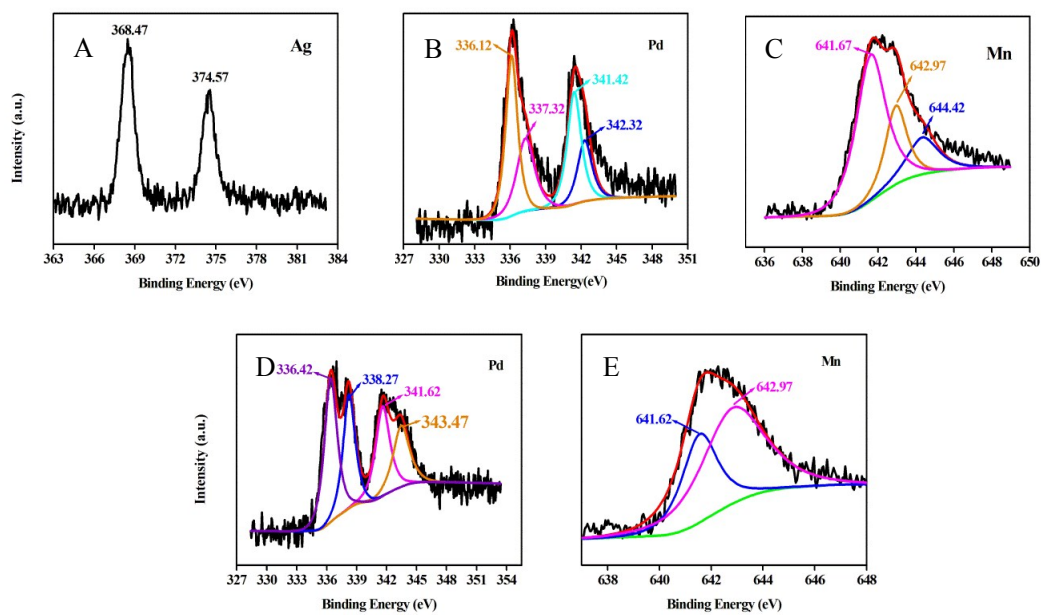

**Fig. S5** XPS patterns of Ag<sub>7</sub>Pd<sub>3</sub>-(MnO<sub>x</sub>)<sub>1.5</sub>/A-CS (A, B and C) and Pd<sub>10</sub>-(MnO<sub>x</sub>)<sub>1.5</sub>/A-CS (D and E)

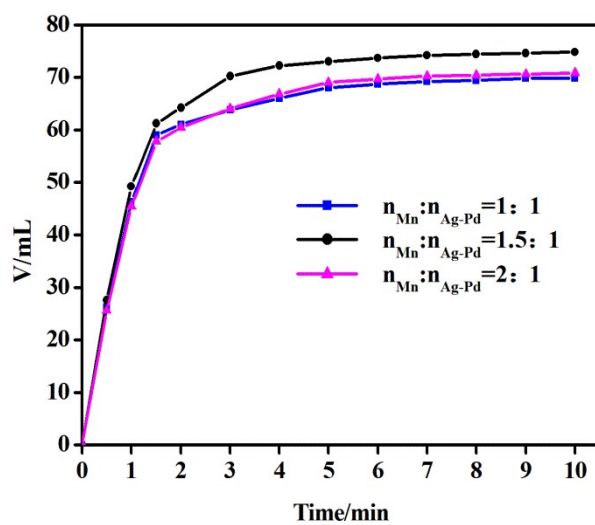

**Fig. S6** Different molar ratios of Mn and Ag-Pd  
 (The reactions were performed at 50°C,  $n_{\text{FA}}:n_{\text{PF}}=2.5:7.5$ )

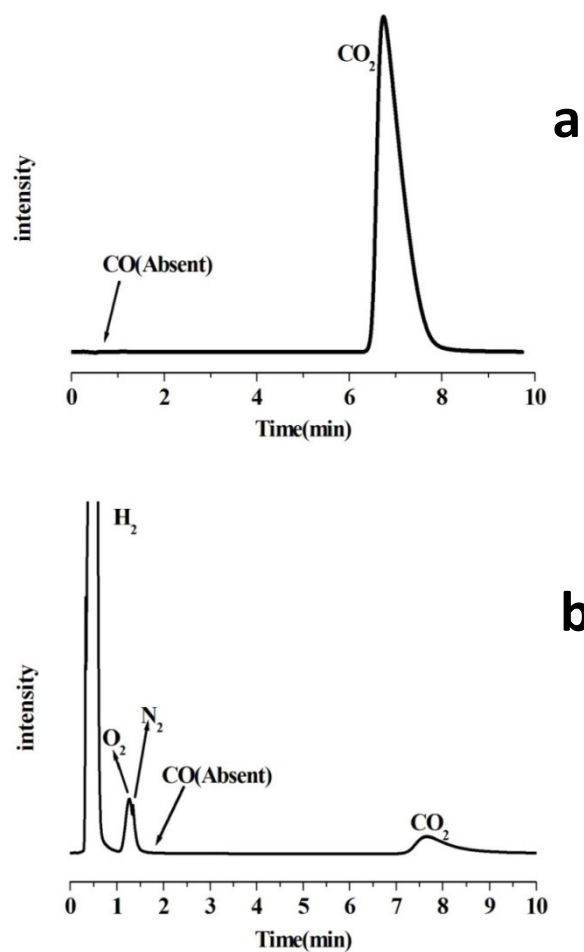

**Fig. S7** GC spectrum using TCD for the evolved gas from FA/PF solution over Ag<sub>1</sub>Pd<sub>9</sub>-(MnO<sub>x</sub>)<sub>1.5</sub>/A-CS. The limit of detection for CO is 0.1 ppm.

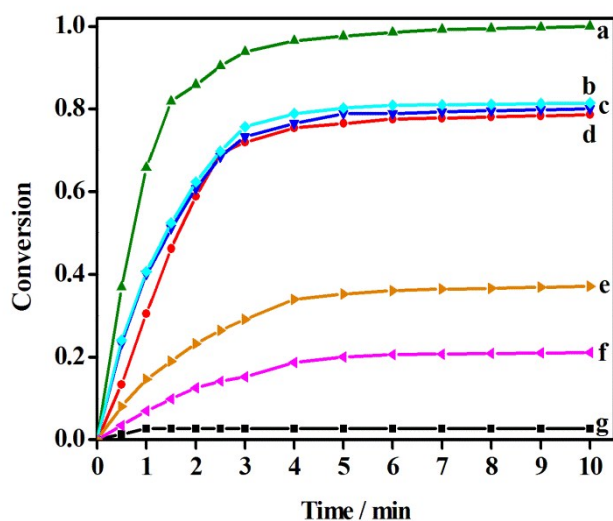

**Fig. S8** Conversion of FA with different catalysts versus time at 50°C.

(a) Ag<sub>1</sub>Pd<sub>9</sub>-(MnO<sub>x</sub>)<sub>1.5</sub>/A-CS, (b) Ag<sub>3</sub>Pd<sub>7</sub>-(MnO<sub>x</sub>)<sub>1.5</sub>/A-CS, (c) Ag<sub>2</sub>Pd<sub>8</sub>-(MnO<sub>x</sub>)<sub>1.5</sub>/A-CS, (d) Pd<sub>10</sub>-(MnO<sub>x</sub>)<sub>1.5</sub>/A-CS, (e) Ag<sub>7</sub>Pd<sub>3</sub>-(MnO<sub>x</sub>)<sub>1.5</sub>/A-CS, (f) Ag<sub>8</sub>Pd<sub>2</sub>-(MnO<sub>x</sub>)<sub>1.5</sub>/A-CS, (g) Ag<sub>10</sub>-(MnO<sub>x</sub>)<sub>1.5</sub>/A-CS

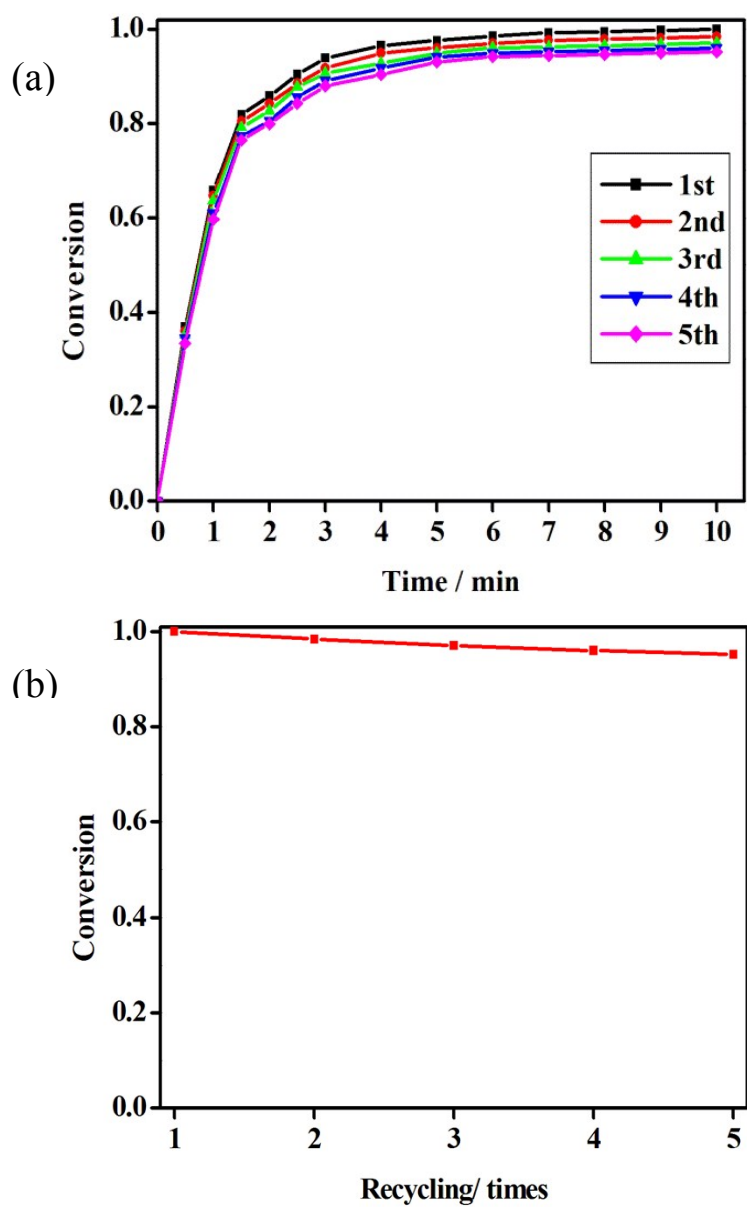

**Fig. S9** Conversion of FA catalyzed by  $\text{Ag}_1\text{Pd}_9\text{-(MnO}_x\text{)}_{1.5}/\text{A-CS}$  versus time (a) and recycling times (b) at  $50^\circ\text{C}$ .

**Table S1** The dosages of reagents for the synthesis of different catalysts

| Catalysts                                                                 | CS/mg | AgNO <sub>3</sub> /mL<br>(1mg/mL) | H <sub>2</sub> PdCl <sub>4</sub> /mL<br>(1mg/mL) | MnSO <sub>4</sub> /mL<br>(1mg/mL) |
|---------------------------------------------------------------------------|-------|-----------------------------------|--------------------------------------------------|-----------------------------------|
| Ag <sub>1</sub> Pd <sub>9</sub> -(MnO <sub>x</sub> ) <sub>1.5</sub> /A-CS | 41    | 0.79                              | 7.51                                             | 11.90                             |
| Ag <sub>2</sub> Pd <sub>8</sub> -(MnO <sub>x</sub> ) <sub>1.5</sub> /A-CS | 41    | 1.58                              | 6.68                                             | 11.90                             |
| Ag <sub>3</sub> Pd <sub>7</sub> -(MnO <sub>x</sub> ) <sub>1.5</sub> /A-CS | 41    | 2.37                              | 5.84                                             | 11.90                             |
| Ag <sub>7</sub> Pd <sub>3</sub> -(MnO <sub>x</sub> ) <sub>1.5</sub> /A-CS | 41    | 5.53                              | 2.50                                             | 11.90                             |
| Ag <sub>8</sub> Pd <sub>2</sub> -(MnO <sub>x</sub> ) <sub>1.5</sub> /A-CS | 41    | 6.32                              | 1.67                                             | 11.90                             |
| Ag <sub>10</sub> -(MnO <sub>x</sub> ) <sub>1.5</sub> /A-CS                | 41    | 7.9                               | 0                                                | 11.90                             |
| Pd <sub>10</sub> -(MnO <sub>x</sub> ) <sub>1.5</sub> /A-CS                | 41    | 0                                 | 8.35                                             | 11.90                             |
| Ag <sub>1</sub> Pd <sub>9</sub> -(MnO <sub>x</sub> ) <sub>1</sub> /A-CS   | 41    | 0.79                              | 7.51                                             | 8.0                               |
| Ag <sub>1</sub> Pd <sub>9</sub> -(MnO <sub>x</sub> ) <sub>2</sub> /A-CS   | 41    | 0.79                              | 7.51                                             | 15.9                              |

**Table S2** The contents of Pd and Ag in AgPd-(MnO<sub>x</sub>)<sub>1.5</sub>/A-CS determined by ICP-AES

| Catalysts                                                                 | Ag ( wt % ) | Pd ( wt % ) | Initial mass ratio of<br>Ag and Pd |
|---------------------------------------------------------------------------|-------------|-------------|------------------------------------|
| Ag <sub>1</sub> Pd <sub>9</sub> -(MnO <sub>x</sub> ) <sub>1.5</sub> /A-CS | 0.97        | 8.92        | 1:9                                |
| Ag <sub>2</sub> Pd <sub>8</sub> -(MnO <sub>x</sub> ) <sub>1.5</sub> /A-CS | 1.96        | 7.94        | 2:8                                |
| Ag <sub>3</sub> Pd <sub>7</sub> -(MnO <sub>x</sub> ) <sub>1.5</sub> /A-CS | 2.92        | 6.90        | 3:7                                |
| Ag <sub>7</sub> Pd <sub>3</sub> -(MnO <sub>x</sub> ) <sub>1.5</sub> /A-CS | 6.91        | 2.91        | 7:3                                |
| Ag <sub>8</sub> Pd <sub>2</sub> -(MnO <sub>x</sub> ) <sub>1.5</sub> /A-CS | 7.93        | 1.95        | 8:2                                |

**Table S3** The N<sub>2</sub> adsorption-desorption isotherms of CS and Ag<sub>1</sub>Pd<sub>9</sub>-(MnO<sub>x</sub>)<sub>1.5</sub>/CS

| Sample                                                                    | S <sub>BET</sub><br>(m <sup>2</sup> g <sup>-1</sup> ) | Pore volume<br>(cm <sup>3</sup> g <sup>-1</sup> ) | Pore diameter<br>(nm) |
|---------------------------------------------------------------------------|-------------------------------------------------------|---------------------------------------------------|-----------------------|
| A-CS                                                                      | 782.63                                                | 0.65                                              | 3.39                  |
| Ag <sub>1</sub> Pd <sub>9</sub> -(MnO <sub>x</sub> ) <sub>1.5</sub> /A-CS | 722.47                                                | 0.61                                              | 3.30                  |
| K-CS                                                                      | 2084.06                                               | 1.08                                              | 2.08                  |
| Ag <sub>1</sub> Pd <sub>9</sub> -(MnO <sub>x</sub> ) <sub>1.5</sub> /K-CS | 1519.24                                               | 0.80                                              | 2.12                  |
